# Supplementary material
Source: PubMed Central journal article supplement (PMC4175710)
Supplement: NIHMS615719-supplement-JNE495392suppdata_pdf.pdf [file NIHMS615719-supplement-JNE495392suppdata_pdf.pdf]

**Table S1. Behavioral modulation of single units responses.**

| Measure                            | Quiet       | Whisking    | p-value  |
|------------------------------------|-------------|-------------|----------|
| BA (Hz)                            | 12 ± 7      | 14 ± 9      | p<0.001* |
| RM (spikes/stimulus)               | 0.29 ± 0.13 | 0.21 ± 0.1  | p=0.015* |
| Peak latency (ms)                  | 13 ± 3      | 13 ± 3      | p= 0.98  |
| 1 <sup>st</sup> spike latency (ms) | 6.3 ± 0.1   | 6.4 ± 0.2   | p=0.150  |
| 1 <sup>st</sup> spike jitter (ms)  | 1.19 ± 0.08 | 1.23 ± 0.06 | p=0.331  |

**Table S2. Stimulus modulation of single units responses.**

| Measure                            | 60 μs       | 120 μs      | 240 μs      | p-value    |
|------------------------------------|-------------|-------------|-------------|------------|
| RM (spikes/stimulus)               | 0.05 ± 0.10 | 0.23 ± .19  | 0.49 ± 0.21 | p<0.001*** |
| Peak latency (ms)                  | 17 ± 5      | 13 ± 4      | 9 ± 2       | p<0.002**  |
| 1 <sup>st</sup> spike latency (ms) | 6.7 ± 0.2   | 6.4 ± 0.2   | 6.0 ± 0.2   | p<0.001*** |
| 1 <sup>st</sup> spike jitter (ms)  | 1.39 ± 0.07 | 1.21 ± 0.09 | 1.04 ± 0.05 | p<0.001*** |

Tables S1 and S2 report the estimated value ± 95% CI for the neurophysiological parameters defined in the data analysis method section: background activity (BA); 2) response magnitude (RM); 3) peak latency; 4) latency of the first spike and 5) jitter of the first spike for the single units. Table S1 reports the change in the neurophysiological parameters as a function of the behavioral state of the animal. Table S2 reports the change in the same parameters as a function of the different stimulus strengths. For both tables the p-value column reports the statistical significance of the corresponding ANOVA FACTOR (Behavior Table S1 and Stimulus Table S2).

| Measure                            | Factor              | F-value          | p-value    |
|------------------------------------|---------------------|------------------|------------|
| Number of responsive cells (units) | Stimulus            | F(2,8)= 9.628    | p=0.007**  |
|                                    | Behavior            | F(1,4)=134.224   | p<0.001*** |
|                                    | Stimulus x Behavior | F(2,8)=1.810     | p=0.225    |
| RM (spikes/stimulus)               | Stimulus            | F(2,196)=77.650  | p<0.001*** |
|                                    | Behavior            | F(1,98)= 34.348  | p<0.001*** |
|                                    | Stimulus x Behavior | F(2,196)=15.256  | p<0.001*** |
| Peak latency (ms)                  | Stimulus            | F(2,196)=26.156  | p<0.001*** |
|                                    | Behavior            | F(1,98)=0.040    | p=0.842    |
|                                    | Stimulus x Behavior | F(2,196)=0.745   | p=0.476    |
| 1 <sup>st</sup> spike latency (ms) | Stimulus            | F(2,196)=128.552 | p<0.001*** |
|                                    | Behavior            | F(1,98)=25.845   | p<0.001*** |
|                                    | Stimulus x Behavior | F(2,196)=4.213   | p=0.016*   |
| 1 <sup>st</sup> spike jitter (ms)  | Stimulus            | F(2,196)=108.312 | p<0.001*** |
|                                    | Behavior            | F(1,98)=26.300   | p<0.001*** |
|                                    | Stimulus x Behavior | F(2,196)=8.525   | p<0.001*** |
| MI All vs. Background (bits)       | Encoding            | F(1,21)=24.906   | p<0.001*** |
|                                    | Behavior            | F(1,21)=7.740    | p=0.011*   |
|                                    | Encoding x Behavior | F(1,21)=0.217    | p=0.646    |
| MI Single vs. Background (bits)    | Encoding            | F(1,21)=26.500   | p<0.001*** |
|                                    | Behavior            | F(1,21)=4.529    | p=0.045*   |
|                                    | Stimulus            | F(2,42)=14.196   | p<0.001*** |
|                                    | Encoding x Behavior | F(1,21)=0.015    | p=0.905    |
|                                    | Encoding x Stimulus | F(2,42)=7.046    | p=0.002**  |
|                                    | Behavior x Stimulus | F(2,42)=5.563    | p=0.007**  |
| Encoding x Stimulus x Behavior     | F(2,42)=2.656       | p=0.082(*)       |            |
| MI Discrimination (bits)           | Encoding            | F(1,21)=77.760   | p<0.001*** |
|                                    | Behavior            | F(1,21)=6.193    | p=0.021*   |
|                                    | Encoding x Behavior | F(1,21)=0.727    | p=0.403    |
| Temporal Information (bits)        | Encoding            | F(1,38)=40.482   | p<0.001*** |
|                                    | Behavior            | F(1,38)=1.153    | p=0.290    |
|                                    | Encoding x Behavior | F(1,38)=1.667    | p=0.204    |

Tables S3 reports all the p values for all ANOVAs performed on the neurophysiological parameters (refer to Table S1-2 legend for abbreviations) and on the Mutual Information (MI) estimates for the cases of: 1) stimulus detection when grouping all responses to the three stimulus intensities together and comparing vs background “MI All vs. Background”; 2) stimulus detection when grouping each single stimulus intensities vs background “MI Single vs. Background (bits)”; 3) stimulus discrimination “MI Discrimination” and 4) information extracted using only first spikes and only responsive trials “Temporal Information”. (\*) = p<0.1 (tendency), \* = p<0.05, \*\* = p<0.01, \*\*\* = p<0.001

| Measure                            | Factor                     | Level                      | Mean differences<br>± 95% C.I.  |                            |
|------------------------------------|----------------------------|----------------------------|---------------------------------|----------------------------|
| Number of responsive cells (units) | Stimulus                   | 240 vs. 60 $\mu$ s         | 9.30 ± 5.70*                    |                            |
|                                    |                            | 240 vs. 120 $\mu$ s        | 4.80 ± 6.62                     |                            |
|                                    |                            | 120 vs. 60 $\mu$ s         | 4.50 ± 5.25 <sup>(*)</sup>      |                            |
|                                    | Behavior                   | Quiet vs. Whisking         | 6.73 ± 1.61 <sup>***</sup>      |                            |
| RM (spikes/stimulus)               | Stimulus                   | 240 vs. 60 $\mu$ s         | 0.70 ± 0.17 <sup>***</sup>      |                            |
|                                    |                            | 240 vs. 120 $\mu$ s        | 0.42 ± 0.14 <sup>***</sup>      |                            |
|                                    |                            | 120 vs. 60 $\mu$ s         | 0.28 ± 0.09 <sup>***</sup>      |                            |
|                                    | Behavior                   | Quiet vs. Whisking         | 0.18 ± 0.06 <sup>***</sup>      |                            |
|                                    |                            | Stimulus x Behavior        | 60 $\mu$ s: Quiet vs. Whisking  | 0.02 ± 0.07                |
|                                    |                            |                            | 120 $\mu$ s: Quiet vs. Whisking | 0.28 ± 0.09 <sup>***</sup> |
| 240 $\mu$ s: Quiet vs. Whisking    | 0.24 ± 0.09 <sup>***</sup> |                            |                                 |                            |
| Peak Latency (ms)                  | Stimulus                   | 240 vs. 60 $\mu$ s         | -5.64 ± 1.88 <sup>***</sup>     |                            |
|                                    |                            | 240 vs. 120 $\mu$ s        | -3.59 ± 1.80 <sup>***</sup>     |                            |
|                                    |                            | 120 vs. 60 $\mu$ s         | -2.06 ± 2.12 <sup>(*)</sup>     |                            |
|                                    | Behavior                   | Quiet vs. Whisking         | 0.01 ± 1.1                      |                            |
| 1 <sup>st</sup> spike latency (ms) | Stimulus                   | 240 vs. 60 $\mu$ s         | -0.67 ± 0.11 <sup>***</sup>     |                            |
|                                    |                            | 240 vs. 120 $\mu$ s        | -0.39 ± 0.01 <sup>***</sup>     |                            |
|                                    |                            | 120 vs. 60 $\mu$ s         | -0.27 ± 0.09 <sup>***</sup>     |                            |
|                                    | Behavior                   | Quiet vs. Whisking         | 0.10 ± 0.04 <sup>***</sup>      |                            |
|                                    |                            | Stimulus x Behavior        | 60 $\mu$ s: Quiet vs. Whisking  | 0.07 ± 0.08 <sup>(*)</sup> |
|                                    |                            |                            | 120 $\mu$ s: Quiet vs. Whisking | 0.06 ± 0.06 <sup>(*)</sup> |
| 240 $\mu$ s: Quiet vs. Whisking    | 0.18 ± 0.05 <sup>***</sup> |                            |                                 |                            |
| 1 <sup>st</sup> spike Jitter (ms)  | Stimulus                   | 240 vs. 60 $\mu$ s         | -0.33 ± 0.06 <sup>***</sup>     |                            |
|                                    |                            | 240 vs. 120 $\mu$ s        | -0.19 ± 0.06 <sup>***</sup>     |                            |
|                                    |                            | 120 vs. 60 $\mu$ s         | -0.15 ± 0.06 <sup>***</sup>     |                            |
|                                    | Behavior                   | Quiet vs. Whisking         | 0.08 ± 0.03 <sup>***</sup>      |                            |
|                                    |                            | Stimulus x Behavior        | 60 $\mu$ s: Quiet vs. Whisking  | 0.02 ± 0.05                |
|                                    |                            |                            | 120 $\mu$ s: Quiet vs. Whisking | 0.07 ± 0.04 <sup>**</sup>  |
| 240 $\mu$ s: Quiet vs. Whisking    | 0.15 ± 0.05 <sup>***</sup> |                            |                                 |                            |
| MI All vs Background (bits)        | Encoding                   | Timing vs. Count           | 0.019 ± 0.014*                  |                            |
|                                    | Behavior                   | Quiet vs. Whisking         | 0.040 ± 0.017 <sup>***</sup>    |                            |
|                                    | Encoding                   | Timing vs. Count           | 0.048 ± 0.019 <sup>***</sup>    |                            |
|                                    | Behavior                   | Quiet vs. Whisking         | 0.024 ± 0.023*                  |                            |
| MI Single vs Background (bits)     | Stimulus                   | 240 vs. 60 $\mu$ s         | 0.15 ± 0.08 <sup>**</sup>       |                            |
|                                    |                            | 240 vs. 120 $\mu$ s        | 0.10 ± 0.05 <sup>***</sup>      |                            |
|                                    |                            | 120 vs. 60 $\mu$ s         | 0.04 ± 0.05 <sup>(*)</sup>      |                            |
|                                    | Behavior x Stimulus        | Quiet: 240 vs. 60 $\mu$ s  | 0.17 ± 0.09 <sup>***</sup>      |                            |
|                                    |                            | Quiet: 240 vs. 120 $\mu$ s | 0.10 ± 0.05 <sup>***</sup>      |                            |
|                                    |                            | Quiet: 120 vs. 60 $\mu$ s  | 0.07 ± 0.07 <sup>(*)</sup>      |                            |

|                                |                     |                                 |                         |
|--------------------------------|---------------------|---------------------------------|-------------------------|
|                                |                     | Whisking: 240 vs. 60 $\mu$ s    | $0.12 \pm 0.10^*$       |
|                                |                     | Whisking: 240 vs. 120 $\mu$ s   | $0.10 \pm 0.08^{**}$    |
|                                |                     | Whisking: 120 vs. 60 $\mu$ s    | $0.02 \pm 0.06$         |
|                                | Encoding x Stimulus | 60 $\mu$ s: Quiet vs. Whisking  | $0.023 \pm 0.018^*$     |
|                                |                     | 120 $\mu$ s: Quiet vs. Whisking | $0.032 \pm 0.031^*$     |
|                                |                     | 240 $\mu$ s: Quiet vs. Whisking | $0.089 \pm 0.037^{***}$ |
| MI Discrimination<br>(bits)    | Encoding            | Timing vs. Count                | $0.065 \pm 0.15^{***}$  |
|                                | Behavior            | Quiet vs. Whisking              | $0.036 \pm 0.030^*$     |
| Temporal<br>Information (bits) | Encoding            | Temporal vs. Count              | $0.095 \pm 0.030^{***}$ |
|                                | Behavior            | Quiet vs. Whisking              | $-0.014 \pm 0.030$      |

Tables S4 reports the mean differences between levels for each single factor of all ANOVAs and mean differences between levels for each interaction between factors only if the interaction was statistically significant (see Table S3 for abbreviations). Asterisks denote statistically significant differences: (\*) =  $p < 0.1$  (tendency), \* =  $p < 0.05$ , \*\* =  $p < 0.01$ , \*\*\* =  $p < 0.001$
